# Supplementary material
Source: PubMed Central journal article supplement (PMC9978040)
Supplement: NIHMS1839214-supplement-1.pdf [file NIHMS1839214-supplement-1.pdf]

**Supplementary Table 1.** Diagnosis, procedure, and treatment codes used in the study.

| <b>Diagnosis Description</b>                            | <b>ICD9</b>                                               | <b>ICD10</b>     |
|---------------------------------------------------------|-----------------------------------------------------------|------------------|
| Angle closure with glaucoma                             | 365.2*                                                    | H40.2*           |
| Anatomical narrow angle, angle closure without glaucoma | 365.02, 365.06                                            | H40.03*, H40.069 |
| Age-related cataract                                    | 366.*                                                     | H25.*            |
| Pseudophakia                                            | V43.1                                                     | Z96.1            |
| <b>In-office Procedures</b>                             |                                                           |                  |
|                                                         | <b>CPT</b>                                                |                  |
| Gonioscopy                                              | 92020                                                     |                  |
| Laser peripheral iridotomy                              | 66761                                                     |                  |
| Iridoplasty                                             | 66762                                                     |                  |
| <b>Glaucoma Surgeries</b>                               |                                                           |                  |
|                                                         | <b>CPT</b>                                                |                  |
| Surgical iridotomy                                      | 66500, 66505                                              |                  |
| Surgical iridectomy                                     | 66625, 66630                                              |                  |
| Lens extraction / Cataract surgery                      | 66850, 66852, 66920, 66930, 66940,<br>66982, 66983, 66984 |                  |
| Goniosynechiolysis                                      | 65865                                                     |                  |
| Trabeculectomy                                          | 66170, 66172                                              |                  |
| Aqueous shunt with or without graft                     | 66179, 66180                                              |                  |
| Cyclophotocoagulation                                   | 66710, 66711                                              |                  |
| <b>Drops</b>                                            |                                                           |                  |
|                                                         | <b>AHFS Classification Code</b>                           |                  |
| Alpha agonists                                          | 52400400                                                  |                  |
| Beta blockers                                           | 52400800                                                  |                  |
| Carbonic anhydrase inhibitors                           | 52401200                                                  |                  |
| Miotics                                                 | 52402000                                                  |                  |
| Prostaglandin analogs                                   | 52402800                                                  |                  |
| Antiglaucoma agent, misc                                | 52409200                                                  |                  |

ICD9 = International Classification of Diseases, Ninth Revision codes; ICD10 = International Classification of Diseases, Tenth Revision codes; CPT = Current Procedural Terminology; AHFS = American Hospital Formulary Service.
