# Supplementary material
Source: PubMed Central journal article supplement (PMC9978040)
Supplement: NIHMS1839214-supplement-2.pdf [file NIHMS1839214-supplement-2.pdf]

---

**Supplementary Table 2.** Pearson correlation matrix between treatments and age at anatomical narrow angle (ANA) diagnosis.

---

| <b>Variable</b>    | Age   | LPI   | IOP-lowering Drops | Cataract Surgery |
|--------------------|-------|-------|--------------------|------------------|
| Age                |       |       |                    |                  |
| LPI                | -0.06 |       |                    |                  |
| IOP-lowering Drops | 0.07  | 0.12  |                    |                  |
| Cataract Surgery   | 0.4   | -0.01 | 0.12               |                  |

---
