# Supplementary material
Source: PubMed Central journal article supplement (PMC9978040)
Supplement: NIHMS1839214-supplement-3.pdf [file NIHMS1839214-supplement-3.pdf]

**Supplementary Table 3.** Bivariable analyses between age and treatments for risk of detected conversion to primary angle closure glaucoma (PACG).

| Model | Bivariable Analysis       |                           |                   |
|-------|---------------------------|---------------------------|-------------------|
|       |                           | HR (CI)                   | P-value           |
| 1     | <i>Age</i>                |                           |                   |
|       | <40                       | 1.61 (0.89-2.92)          | 0.116             |
|       | 40-49                     | REF                       |                   |
|       | 50-59                     | 0.86 (0.61-1.23)          | 0.411             |
|       | 60-69                     | 0.97 (0.70-1.35)          | 0.862             |
|       | 70-79                     | 0.96 (0.70-1.33)          | 0.819             |
|       | 80+                       | 0.97 (0.63-1.49)          | 0.878             |
|       | <i>LPI</i>                |                           |                   |
|       | None                      | REF                       |                   |
|       | Early                     | <b>1.81 (1.44 - 2.26)</b> | <b>&lt; 0.001</b> |
| Late  | <b>0.50 (0.32 - 0.77)</b> | <b>0.002</b>              |                   |
| 2     | <i>Age</i>                |                           |                   |
|       | <40                       | 1.68 (0.93-3.05)          | 0.086             |
|       | 40-49                     | REF                       |                   |
|       | 50-59                     | 0.91 (0.64-1.29)          | 0.586             |
|       | 60-69                     | 1.23 (0.88-1.72)          | 0.219             |
|       | 70-79                     | <b>1.60 (1.16-2.21)</b>   | <b>0.004</b>      |
|       | 80+                       | <b>1.74 (1.12-2.71)</b>   | <b>0.013</b>      |
|       | <i>Cataract Surgery</i>   |                           |                   |
|       | None                      | REF                       |                   |
|       | Early                     | <b>0.55 (0.34-0.89)</b>   | <b>0.015</b>      |
| Late  | <b>0.10 (0.06-0.17)</b>   | <b>&lt; 0.001</b>         |                   |
| 3     | <i>Age</i>                |                           |                   |
|       | <40                       | <b>1.85 (1.02-3.36)</b>   | <b>0.042</b>      |
|       | 40-49                     | REF                       |                   |
|       | 50-59                     | 0.86 (0.61-1.22)          | 0.404             |
|       | 60-69                     | 1.00 (0.72-1.39)          | 0.993             |
|       | 70-79                     | 1.04 (0.75-1.43)          | 0.828             |
|       | 80+                       | 1.12 (0.72-1.72)          | 0.619             |
|       | <i>IOP-lowering Drops</i> |                           |                   |
|       | None                      | REF                       |                   |
|       | Early                     | <b>2.35 (1.90-2.89)</b>   | <b>&lt; 0.001</b> |
| Late  | <b>1.40 (1.05-1.85)</b>   | <b>0.021</b>              |                   |

Model 1: Bivariable model of age and LPI timing.

Model 2: Bivariable model of age and cataract surgery timing.

Model 3: Bivariable model of age and IOP-lowering drops timing.
