# Supplementary material
Source: PubMed Central journal article supplement (PMC9978040)
Supplement: NIHMS1839214-supplement-4.pdf [file NIHMS1839214-supplement-4.pdf]

**Supplementary Table 4.** Sensitivity analysis A: Factors associated with diagnostic conversion to primary angle closure glaucoma (PACG) with non-converters censored at 6 years.

|                           | Univariable Analysis    |                   | Multivariable Analysis  |              |
|---------------------------|-------------------------|-------------------|-------------------------|--------------|
|                           | HR (CI)                 | P-value           | HR (CI)                 | P-value      |
| <b>Age</b>                |                         |                   |                         |              |
| <40                       | 1.17 (0.65-2.12)        | 0.603             | 1.30 (0.60-2.81)        | 0.505        |
| 40-49                     | REF                     |                   | REF                     |              |
| 50-59                     | 0.85 (0.60-1.21)        | 0.375             | 0.95 (0.64-1.42)        | 0.821        |
| 60-69                     | 0.98 (0.70-1.36)        | 0.898             | 1.47 (1.00-2.17)        | 0.052        |
| 70-79                     | 0.87 (0.63-1.21)        | 0.412             | <b>2.11 (1.42-3.15)</b> | <b>0.001</b> |
| 80+                       | 0.66 (0.43-1.02)        | 0.06              | <b>2.10 (1.26-3.51)</b> | <b>0.005</b> |
| <b>Sex</b>                |                         |                   |                         |              |
| Female                    | REF                     |                   | REF                     |              |
| Male                      | 0.99 (0.82-1.20)        | 0.943             | 0.93 (0.75-1.15)        | 0.485        |
| <b>Race/Ethnicity</b>     |                         |                   |                         |              |
| White                     | REF                     |                   | REF                     |              |
| Asian                     | 1.38 (0.95-2.01)        | 0.094             | 1.18 (0.76-1.81)        | 0.462        |
| Black                     | 1.15 (0.84-1.58)        | 0.388             | 1.00 (0.70-1.43)        | 0.980        |
| Hispanic                  | 1.18 (0.89-1.56)        | 0.242             | 1.01 (0.74-1.38)        | 0.929        |
| <b>Education</b>          |                         |                   |                         |              |
| H.S. degree or less       | REF                     |                   | -                       |              |
| Some college              | 1.00 (0.79-1.27)        | 0.993             | -                       |              |
| College graduate          | 0.99 (0.74-1.31)        | 0.924             | -                       |              |
| <b>Income</b>             |                         |                   |                         |              |
| <\$40K                    | REF                     |                   | REF                     |              |
| \$40K-49K                 | 1.24 (0.81-1.90)        | 0.322             | 1.19 (0.77-1.83)        | 0.427        |
| \$50K-59K                 | <b>1.47 (1.01-2.14)</b> | <b>0.042</b>      | 1.35 (0.92-1.97)        | 0.125        |
| \$60K-74K                 | 1.13 (0.79-1.62)        | 0.507             | 1.10 (0.76-1.59)        | 0.624        |
| \$75K-99K                 | 1.11 (0.81-1.54)        | 0.517             | 1.03 (0.74-1.45)        | 0.846        |
| \$100K+                   | 1.01 (0.76-1.33)        | 0.954             | 0.90 (0.66-1.23)        | 0.509        |
| <b>Insurance</b>          |                         |                   |                         |              |
| HMO                       | REF                     |                   | -                       |              |
| EPO                       | <b>1.55 (1.02-2.37)</b> | <b>0.041</b>      | 1.53 (0.92-2.54)        | 0.103        |
| Other                     | <b>1.42 (1.15-1.76)</b> | <b>0.001</b>      | <b>1.61 (1.24-2.10)</b> | <b>0.001</b> |
| PPO                       | 0.96 (0.66-1.39)        | 0.814             | 0.89 (0.57-1.38)        | 0.588        |
| <b>Location</b>           |                         |                   |                         |              |
| Northeast                 | REF                     |                   | REF                     |              |
| South                     | 1.02 (0.80-1.31)        | 0.859             | 0.91 (0.69-1.21)        | 0.532        |
| Midwest                   | 0.96 (0.72-1.28)        | 0.789             | 0.82 (0.60-1.13)        | 0.235        |
| Mountain                  | 1.30 (0.84-2.01)        | 0.232             | 0.98 (0.61-1.59)        | 0.948        |
| Pacific                   | 0.89 (0.63-1.24)        | 0.49              | <b>0.61 (0.41-0.92)</b> | <b>0.018</b> |
| <b>LPI</b>                |                         |                   |                         |              |
| None                      | REF                     |                   | REF                     |              |
| Early                     | <b>3.66 (2.97-4.50)</b> | <b>&lt; 0.001</b> | <b>3.99 (3.15-5.06)</b> | <b>0.001</b> |
| Late                      | <b>3.73 (2.82-4.94)</b> | <b>&lt; 0.001</b> | <b>3.21 (2.34-4.40)</b> | <b>0.001</b> |
| <b>Cataract Surgery</b>   |                         |                   |                         |              |
| None                      | REF                     |                   | REF                     |              |
| Early                     | <b>0.23 (0.14-0.36)</b> | <b>&lt; 0.001</b> | <b>0.21 (0.12-0.36)</b> | <b>0.001</b> |
| Late                      | <b>0.11 (0.06-0.18)</b> | <b>&lt; 0.001</b> | <b>0.09 (0.05-0.15)</b> | <b>0.001</b> |
| <b>IOP-lowering Drops</b> |                         |                   |                         |              |
| None                      | REF                     |                   | REF                     |              |
| Early                     | <b>1.89 (1.52-2.36)</b> | <b>&lt; 0.001</b> | <b>1.74 (1.36-2.23)</b> | <b>0.001</b> |
| Late                      | <b>0.64 (0.41-1.00)</b> | <b>0.049</b>      | <b>0.49 (0.29-0.81)</b> | <b>0.006</b> |

Statistically significant p-values and odds ratios are bolded; OR = odds ratio; CI = confidence interval; HMO = health maintenance organization; EPO = exclusive provider organization; PPO = preferred provider organization.
